# Supplementary material for: Engineering a Disulfide Bond in the Lid Hinge Region of Rhizopus chinensis Lipase: Increased Thermostability and Altered Acyl Chain Length Specificity
Source: PubMed Central journal article supplement (PMC3462767; doi:10.1371/journal.pone.0046388), 2012-10-02
Supplement: pone.0046388.s001.pdf [file pone.0046388.s001.pdf]

|     |   |   |   |   |   |   |   |   |   |   |   |   |   |   |   |   |   |   |   |   |   |   |   |   |   |   |   |   |   |   |   |   |   |   |   |   |   |   |   |   |   |   |   |   |   |   |   |   |   |   |   |   |   |   |   |   |   |   |   |   |   |   |   |   |   |   |   |   |   |   |   |   |   |   |   |   |   |   |   |   |   |    |     |   |    |     |     |   |     |
|-----|---|---|---|---|---|---|---|---|---|---|---|---|---|---|---|---|---|---|---|---|---|---|---|---|---|---|---|---|---|---|---|---|---|---|---|---|---|---|---|---|---|---|---|---|---|---|---|---|---|---|---|---|---|---|---|---|---|---|---|---|---|---|---|---|---|---|---|---|---|---|---|---|---|---|---|---|---|---|---|---|---|----|-----|---|----|-----|-----|---|-----|
| RCL | S | D | S | E | V | V | T | A | A | A | T | R | E | L | T | N | A | G | V | A | A | T | A | V | C | R | S | V | V | P | G | T | K | W | D | C | K | C | L | K | Y | V | P | D | C | K | L | K | F | T | S | L | L | T | D | N | G | F | I | L | R | S | D | A | K | T | I | Y | V | T | E | R | G | T | N | S | F | R | S | A | T | 90 |     |   |    |     |     |   |     |
| RNL | S | D | G | E | K | V | V | A | A | T | A | A | T | D | E | F | T | K | A | G | I | A | A | T | A | V | C | R | S | V | V | P | G | N | K | W | D | C | V | Q | C | K | W | V | P | D | C | K | L | I | T | F | T | S | L | L | S | D | T | N | G | Y | V | L | R | S | D | K | O | K | T | I | Y | L | V | E | R | G | T | N | S | F  | R   | S | A  | T   | 90  |   |     |
| RML | S | I | N | G | S | I | R | A | A | T | S | Q | E | I | N | E | L | Y | T | T | L | S | A | N | S | Y | C | R | T | V | I | P | G | A | T | W | D | C | I | H | C | D | . | A | T | E | D | L | K | L | K | T | S | T | L | I | Y | D | T | N | A | M | V | A | R | G | S | E | K | T | I | Y | I | V | E | R | G | S | S | I | E | N  | W   | I | 89 |     |     |   |     |
|     |   |   |   |   |   |   |   |   |   |   |   |   |   |   |   |   |   |   |   |   |   |   |   |   |   |   |   |   |   |   |   |   |   |   |   |   |   |   |   |   |   |   |   |   |   |   |   |   |   |   |   |   |   |   |   |   |   |   |   |   |   |   |   |   |   |   |   |   |   |   |   |   |   |   |   |   |   |   |   |   |   |    |     |   |    |     |     |   |     |
| RCL | T | D | M | V | E | F | T | D | S | P | V | K | A | K | V | H | A | G | F | L | S | S | N | Q | V | K | D | Y | F | P | V | Q | D | L | T | A | Y | D | Y | K | V | I | V | T | G | H | S | L | G | G | A | O | A | L | L | A | G | M | D | L | Y | Q | R | E | K | R | L | S | P | R | N | L | S | I | Y | I | V | G | G | P | R | V  | 180 |   |    |     |     |   |     |
| RNL | T | D | I | V | E | N | E | S | D | K | P | V | K | A | K | V | H | A | G | F | L | S | S | Y | E | Q | V | N | D | Y | F | P | V | Q | D | L | T | A | H | E | T | Y | K | V | I | V | T | G | H | S | L | G | G | A | O | A | L | L | A | G | M | D | L | Y | Q | R | E | P | R | L | S | P | R | N | L | S | I | Y | I | V | G | G  | P   | R | V  | 180 |     |   |     |
| RML | A | I | L | T | E | V | P | V | S | P | P | V | S | E | T | K | V | H | R | G | F | L | S | Y | G | E | V | Q | N | E | L | V | A | T | V | L | D | O | F | K | Q | Y | S | Y | K | V | I | V | T | G | H | S | L | G | G | A | O | A | L | L | C | A | L | D | L | Y | Q | R | E | B | G | L | S | S | N | L | F | I | Y | I | Q | G  | P   | R | V  | 179 |     |   |     |
|     |   |   |   |   |   |   |   |   |   |   |   |   |   |   |   |   |   |   |   |   |   |   |   |   |   |   |   |   |   |   |   |   |   |   |   |   |   |   |   |   |   |   |   |   |   |   |   |   |   |   |   |   |   |   |   |   |   |   |   |   |   |   |   |   |   |   |   |   |   |   |   |   |   |   |   |   |   |   |   |   |   |    |     |   |    |     |     |   |     |
| RCL | G | N | P | A | F | A | N | Y | V | D | S | T | G | I | E | F | H | R | T | V | H | K | R | D | I | V | P | H | V | P | P | O | A | F | G | L | H | P | G | V | E | S | W | I | K | E | D | . | P | A | D | V | O | I | C | T | S | N | I | E | T | K | Q | C | S | N | S | I | V | P | F | T | S | I | A | D | H | L | T | Y | F | G  | I   | N | E  | C   | S   | L | 269 |
| RNL | G | N | P | F | A | N | Y | V | D | S | T | G | I | E | F | Q | T | V | H | K | R | D | I | V | P | H | V | P | P | O | S | G | R | L | H | P | G | V | E | S | W | I | K | S | G | . | T | S | N | V | O | I | C | T | S | E | I | E | T | K | D | C | S | N | S | I | V | P | F | T | S | I | L | D | H | L | S | Y | E | D | I | N  | E   | C | S  | L   | 269 |   |     |
| RML | G | N | P | A | F | A | N | Y | V | D | S | T | G | I | E | F | R | T | V | H | R | D | I | V | P | H | L | P | E | A | A | F | G | L | H | A | G | S | E | Y | I | T | D | N | S | . | B | E | T | V | Q | V | C | T | S | D | L | E | T | S | D | C | S | N | S | I | V | P | F | T | S | V | L | D | H | L | S | Y | E | I | N | T  | C   | L | E  | T   | 269 |   |     |

**Figure S1. Alignment of the amino acid sequence of RCL, RNL and RML**
